# Supplementary material
Source: Springer Nature journal article supplement (https://www.springermedizin.de/resource/supplementary/12935_2007_178_MOESM10_ESM.pdf/9541260)

% Methylation

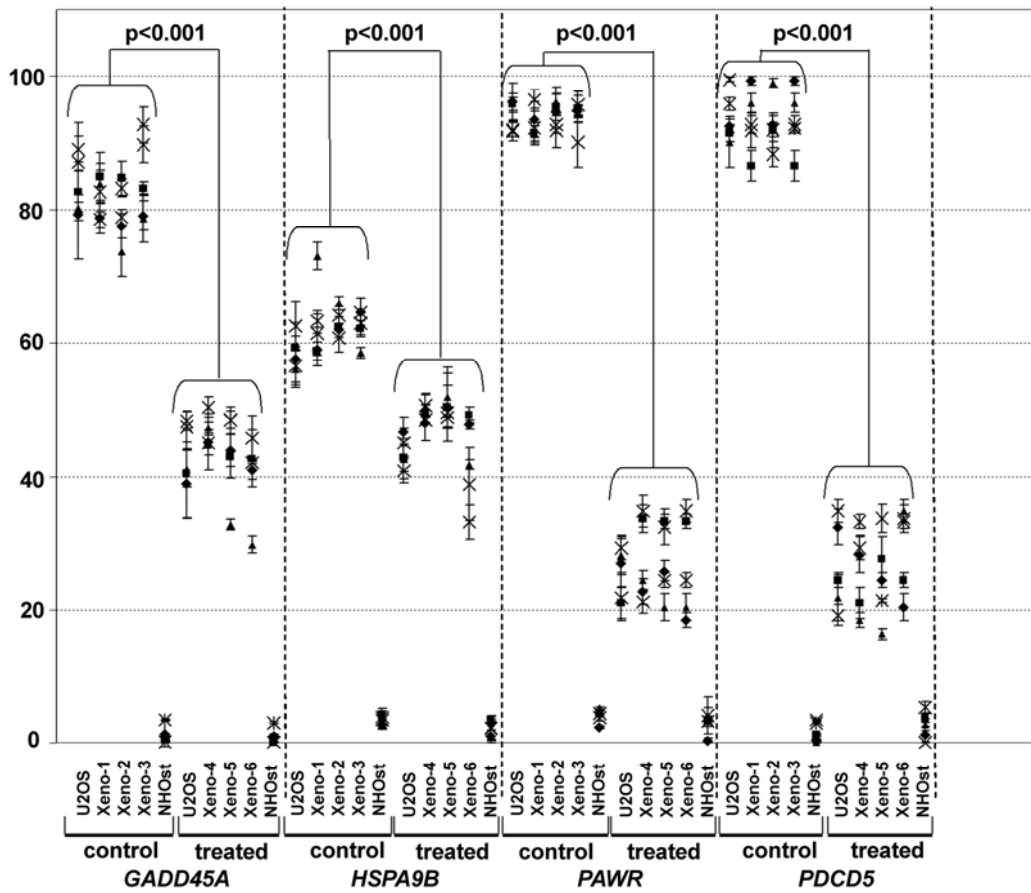

Supplement: MOESM10 [file 9541260]
